# Supplementary material
Source: publisher site journal article supplement (http://www.degruyter.com/publication/journal_key/PDTC/downloadAsset/PDTC_PDTC_Call-for-Papers-2023.pdf)
Supplement: Supplementary file 1 [file PDTC_PDTC_Call-for-Papers-2023.pdf]

# Preservation, Digital Technology & Culture (PDT&C)

<https://www.degruyter.com/journal/key/pdte/html>

Online ISSN: 2195-2965

Print ISSN: 2195-2957

Type: Journal

Language: English

Publisher: De Gruyter Saur

First published: March 26, 2013

Publication Frequency: 4 Issues per Year

Article formats: articles, editorials, reviews, commentaries, and position papers

Audience: librarians, archivists, curators, other cultural heritage professionals, and educators

## Call for Papers

The *Preservation, Digital Technology and Culture* journal seeks original, scholarly articles that engage theoretical and practical perspectives on preservation, access, and use of digital content. We welcome a variety of analytic frameworks and methodologies, including empirical, critical, and case study approaches.

We are particularly interested in articles that touch upon the following areas, but the list is not exhaustive:

- Big/smart data approaches to preservation;
- Cultural heritage informatics, including digital archives and libraries, and digital humanities;
- Community archiving and preservation of digital heritage;
- Use of digital technologies and cultural collections to empower Indigenous knowledge, decolonisation and identity;
- Convergence of libraries, archives, and museums through information technologies such as digitization and linked data;
- Creation, design, evaluation, and use of collections, records, data/metadata, and digital asset management systems for cultural heritage resources;
- Digital preservation and curation;
- Sustainability of preservation projects and programs;
- Environmental impacts of preservation work;
- Cultural perspectives of human-computer interaction;
- Personal archiving of digital records and objects;
- Uses/reuses and users of cultural heritage materials, including creation of exhibits, digital storytelling, and narratives.

We also welcome reports on current digital preservation projects, conferences and symposia, and research in progress, as well as reviews of relevant books and other resources.

# Submission

Online Submission of Manuscripts at <https://mc.manuscriptcentral.com/pdtc>

## Submission process

- Please submit your manuscript online via our [Online Submission Tool](#), following the [StyleSheet](#) and [Style Sheet Personal Pronouns](#)
- The Call for Papers is open year-round

## Your benefits of publishing with us (check our [Ranking](#))

- Wide indexing and abstracting
- Insightful reviews
- High quality manuscript processing through the ScholarOne (WoS Group)
- Every article easily discoverable because of Search Engine Optimization (SEO) and comprehensive [abstracting and indexing services](#)
- Secure archiving by De Gruyter and the independent archiving service [Portico](#)
- Professional sales and marketing activities

## Please note

- Contributions submitted to this journal must be written in clear and concise English
- Before submitting a paper please become familiar with our [Ethical Guidelines](#) <https://www.degruyter.com/publication-ethics> and [Copyright Transfer Agreement](#)
- Once your article is accepted you have the option to publish it [open access](#)
- Our [Repository Policy](#) allows you to distribute 30 PDF copies of your published article to colleagues (the PDF has to include the information that it is an author's copy). Please also feel free to distribute the link to the online abstract
- If you have any general questions please visit our [FAQ for authors](#)

## Open Access

In this journal, authors have the option to publish their article under an open access license. Open Access allows you as an author to retain copyright and share your findings with colleagues and interested parties worldwide without any restraints. More information is available at <https://www.degruyter.com/open-access>.

## Have additional questions or proposals?

Inquiries and abstracts of proposed submissions may be sent to Bogdan Trifunović, Editor-in-Chief ([btrifunovic@gmail.com](mailto:btrifunovic@gmail.com)).

**We look forward to receiving your manuscript!**

Find us on Twitter <http://www.twitter.com/pdtandc>
